# Supplementary material for: Changes in hamstring contractile properties during the competitive season in young football players
Source: PeerJ. 2024 Mar 18;12:e17049. doi: 10.7717/peerj.17049 (PMC10954257; doi:10.7717/peerj.17049)
Supplement: Supplemental Information 1 [file peerj-12-17049-s001.xlsx]

## Sheet: Arkusz1
participant	1 - Td - LBF - Biceps Femoris (left)	1 - Td - RBF - Biceps Femoris (right)	1 - Td - LST - Semitendinosus (left)	1 - Td - RST - Semitendinosus (right)	1 - Tc - LBF - Biceps Femoris (left)	1 - Tc - RBF - Biceps Femoris (right)	1 - Tc - LST - Semitendinosus (left)	1 - Tc - RST - Semitendinosus (right)	1 - Ts - LBF - Biceps Femoris (left)	1 - Ts - RBF - Biceps Femoris (right)	1 - Ts - LST - Semitendinosus (left)	1 - Ts - RST - Semitendinosus (right)	1 - Tr - LBF - Biceps Femoris (left)	1 - Tr - RBF - Biceps Femoris (right)	1 - Tr - LST - Semitendinosus (left)	1 - Tr - RST - Semitendinosus (right)	1 - Dm - LBF - Biceps Femoris (left)	1 - Dm - RBF - Biceps Femoris (right)	1 - Dm - LST - Semitendinosus (left)	1 - Dm - RST - Semitendinosus (right)	1 - Td - LBF - Biceps Femoris (left)	1 - Td - RBF - Biceps Femoris (right)	1 - Td - LST - Semitendinosus (left)	1 - Td - RST - Semitendinosus (right)	1 - Tc - LBF - Biceps Femoris (left)	1 - Tc - RBF - Biceps Femoris (right)	1 - Tc - LST - Semitendinosus (left)	1 - Tc - RST - Semitendinosus (right)	1 - Ts - LBF - Biceps Femoris (left)	1 - Ts - RBF - Biceps Femoris (right)	1 - Ts - LST - Semitendinosus (left)	1 - Ts - RST - Semitendinosus (right)	1 - Tr - LBF - Biceps Femoris (left)	1 - Tr - RBF - Biceps Femoris (right)	1 - Tr - LST - Semitendinosus (left)	1 - Tr - RST - Semitendinosus (right)	1 - Dm - LBF - Biceps Femoris (left)	1 - Dm - RBF - Biceps Femoris (right)	1 - Dm - LST - Semitendinosus (left)	1 - Dm - RST - Semitendinosus (right)	Td BF	Tc BF	Ts BF	Tr BF	Dm BF	Td ST	Tc ST	Ts ST	Tr ST
1	21.3111	21.1707	27.4008	23.8709	18.852	18.992	36.1922	36.8472	218.816	241.934	162.837	161.325	194.093	79.1292	120.024	117.089	3.76353	4.53008	11.3484	9.68604	21.1707	21.3111	23.8709	27.4008	18.852	18.992	36.1922	36.8472	218.816	241.934	161.325	162.837	79.1292	194.093	117.089	120.024	3.76353	4.53008	9.68604	11.3484	0.993411	0.992628	0.904446	0.407686	0.830787	0.871175	0.982223	0.990714	0.975545
2	20.3834	23.1054	23.5009	28.0122	21.2114	22.7165	45.6485	40.5312	241.825	176.138	162.795	147.649	72.5292	34.136	59.5243	77.3291	5.06081	6.37248	8.93078	11.6862	20.3834	23.1054	23.5009	28.0122	21.2114	22.7165	40.5312	45.6485	176.138	241.825	147.649	162.795	34.136	72.5292	59.5243	77.3291	5.06081	6.37248	8.93078	11.6862	0.882192	0.933746	0.728368	0.470652	0.794166	0.838952	0.887897	0.90696	0.769754
3	24.0114	29.966	26.4378	25.0699	33.7313	43.9592	46.442	47.4577	202.812	131.783	113.937	123.735	59.8113	62.1433	50.3296	56.1632	3.78282	5.40192	9.00438	6.71924	24.0114	29.966	25.0699	26.4378	33.7313	43.9592	46.442	47.4577	131.783	202.812	113.937	123.735	59.8113	62.1433	50.3296	56.1632	3.78282	5.40192	6.71924	9.00438	0.801288	0.767333	0.64978	0.962474	0.700274	0.948258	0.978598	0.920819	0.896131
4	22.1787	24.9544	20.8538	20.81	36.3267	43.5321	30.1419	19.5252	365.988	236.736	405.899	235.961	166.611	89.6327	144.739	40.5401	8.86273	12.9277	6.8949	5.28175	22.1787	24.9544	20.81	20.8538	36.3267	43.5321	19.5252	30.1419	236.736	365.988	235.961	405.899	89.6327	166.611	40.5401	144.739	8.86273	12.9277	5.28175	6.8949	0.888767	0.834482	0.646843	0.537975	0.685561	0.997899	0.647775	0.58133	0.280091
5	23.6382	21.6374	26.8012	26.6935	39.0577	23.7399	44.1566	39.9084	239.022	233.326	171.956	170.165	87.791	46.3582	116.953	120.86	10.0311	5.39813	11.3525	10.8513	21.6374	23.6382	26.6935	26.8012	23.7399	39.0577	39.9084	44.1566	233.326	239.022	170.165	171.956	46.3582	87.791	116.953	120.86	5.39813	10.0311	10.8513	11.3525	0.915356	0.607817	0.976168	0.528051	0.538141	0.995981	0.903794	0.989583	0.967674
6	25.6378	30.056	25.0506	29.2167	44.3506	32.5557	42.4387	37.9619	158.271	149.32	124.417	134.535	35.7304	31.9971	61.875	75.4367	7.14647	8.30145	8.76963	8.52321	25.6378	30.056	25.0506	29.2167	32.5557	44.3506	37.9619	42.4387	149.32	158.271	124.417	134.535	31.9971	35.7304	61.875	75.4367	7.14647	8.30145	8.52321	8.76963	0.853001	0.734053	0.943447	0.895515	0.86087	0.857407	0.894511	0.924796	0.820223
7	24.3203	24.5284	23.2163	24.9241	57.708	38.8222	40.0137	42.0832	174.991	198.336	163.487	174.812	52.6281	67.7718	74.1998	84.0982	8.05324	12.8098	8.26462	8.02429	24.3203	24.5284	23.2163	24.9241	38.8222	57.708	40.0137	42.0832	174.991	198.336	163.487	174.812	52.6281	67.7718	74.1998	84.0982	8.05324	12.8098	8.02429	8.26462	0.991516	0.672735	0.882296	0.776548	0.628678	0.931477	0.950823	0.935215	0.882299
8	21.8412	22.5279	25.4148	26.1111	19.3112	32.9516	30.2742	33.6439	224.965	189.257	154.901	139.804	55.8856	50.3895	123.799	101.294	8.09132	7.73323	11.1172	11.2348	21.8412	22.5279	25.4148	26.1111	19.3112	32.9516	30.2742	33.6439	189.257	224.965	139.804	154.901	50.3895	55.8856	101.294	123.799	7.73323	8.09132	11.1172	11.2348	0.969521	0.586046	0.841271	0.901655	0.955744	0.973334	0.89984	0.902537	0.818214
9	28.108	29.7075	27.2943	27.5371	37.9282	29.0931	52.7695	43.9199	160.534	149.268	128.847	153.201	45.2435	46.501	43.7722	87.6933	6.67006	5.24286	4.43146	5.72719	28.108	29.7075	27.2943	27.5371	29.0931	37.9282	43.9199	52.7695	149.268	160.534	128.847	153.201	45.2435	46.501	43.7722	87.6933	5.24286	6.67006	4.43146	5.72719	0.946157	0.767057	0.929824	0.972958	0.786029	0.991182	0.832297	0.841037	0.499151
10	29.1178	26.5992	28.0462	22.3075	47.0081	53.8439	47.8833	42.0795	147.199	151.095	105.931	133.711	41.774	66.5247	51.3245	81.6268	9.48632	6.62553	10.8063	7.7784	26.5992	29.1178	22.3075	28.0462	47.0081	53.8439	42.0795	47.8833	147.199	151.095	105.931	133.711	41.774	66.5247	51.3245	81.6268	6.62553	9.48632	7.7784	10.8063	0.913502	0.873044	0.974218	0.627948	0.69843	0.795384	0.878794	0.792243	0.62877
11	20.7228	22.3365	21.1287	24.4893	17.7881	17.9294	40.9951	47.8752	299.717	420.578	158.459	156.86	69.4925	28.7077	31.579	39.5457	4.63689	2.95619	5.87253	6.78691	20.7228	22.3365	21.1287	24.4893	17.7881	17.9294	40.9951	47.8752	299.717	420.578	156.86	158.459	28.7077	69.4925	31.579	39.5457	2.95619	4.63689	5.87253	6.78691	0.927755	0.992119	0.712632	0.413105	0.637538	0.862773	0.856291	0.989907	0.798546
12	18.1614	21.4353	23.1708	24.1209	16.4377	20.2117	35.5015	38.2393	30.4539	266.521	160.189	120.6	11.511	236.128	104.017	68.519	3.27683	3.30965	7.32848	7.11149	18.1614	21.4353	23.1708	24.1209	16.4377	20.2117	35.5015	38.2393	30.4539	266.521	120.6	160.189	11.511	236.128	68.519	104.017	3.27683	3.30965	7.11149	7.32848	0.847267	0.813279	0.114264	0.0487489	0.990085	0.960611	0.928404	0.752865	0.65873
13	18.2629	21.2137	24.2674	24.8372	18.3896	18.3799	39.8392	41.9576	55.5096	165.155	176.444	176.085	32.8198	142.507	61.9445	60.7144	3.04914	3.13778	8.50987	9.94109	18.2629	21.2137	24.2674	24.8372	18.3799	18.3896	39.8392	41.9576	55.5096	165.155	176.085	176.444	32.8198	142.507	60.7144	61.9445	3.04914	3.13778	8.50987	9.94109	0.860902	0.999474	0.336107	0.230303	0.97175	0.977061	0.949513	0.99797	0.980142
14	26.2033	27.6626	25.7911	21.926	33.0782	43.4375	39.8978	43.6869	205.28	224.936	161.867	177.777	62.8427	75.4848	99.2938	123.604	12.5656	12.8709	11.0438	7.89421	26.2033	27.6626	21.926	25.7911	33.0782	43.4375	39.8978	43.6869	205.28	224.936	161.867	177.777	62.8427	75.4848	99.2938	123.604	12.5656	12.8709	7.89421	11.0438	0.947245	0.761513	0.912615	0.83252	0.976286	0.850137	0.913266	0.91051	0.803324
15	22.1825	21.2579	22.448	22.0759	24.3658	23.9595	41.754	47.9971	207.429	173.217	151.814	130.564	56.6124	31.0755	72.0347	61.6191	6.88667	6.63289	8.75297	7.83808	21.2579	22.1825	22.0759	22.448	23.9595	24.3658	41.754	47.9971	173.217	207.429	130.564	151.814	31.0755	56.6124	61.6191	72.0347	6.63289	6.88667	7.83808	8.75297	0.958318	0.983325	0.835064	0.548916	0.96315	0.983424	0.869928	0.860031	0.855409
16	24.1353	18.2528	23.2031	20.1176	37.6041	25.1159	23.6672	34.6677	213.829	216.935	205.67	201.568	169.519	165.563	99.2052	58.9513	3.87488	3.62672	3.1348	3.77128	18.2528	24.1353	20.1176	23.2031	25.1159	37.6041	23.6672	34.6677	213.829	216.935	201.568	205.67	165.563	169.519	58.9513	99.2052	3.62672	3.87488	3.1348	3.77128	0.756271	0.667903	0.985683	0.976669	0.935956	0.867022	0.682686	0.980058	0.594236
17	26.5882	25.2752	25.4592	22.5403	62.6322	52.902	37.5607	31.7204	135.051	138.737	141.693	151.915	51.0302	56.2208	75.8633	73.905	7.29723	8.21738	8.99951	9.10682	25.2752	26.5882	22.5403	25.4592	52.902	62.6322	31.7204	37.5607	135.051	138.737	141.693	151.915	51.0302	56.2208	73.905	75.8633	7.29723	8.21738	8.99951	9.10682	0.950619	0.844646	0.973428	0.907675	0.888024	0.885349	0.844511	0.932711	0.974186
18	21.1069	31.7806	25.6136	27.0296	16.5722	52.2739	38.0322	47.8884	336.65	178.753	203.277	164.299	68.0726	103.679	117.236	86.7505	2.62924	7.53007	12.4873	9.89146	21.1069	31.7806	25.6136	27.0296	16.5722	52.2739	38.0322	47.8884	178.753	336.65	164.299	203.277	68.0726	103.679	86.7505	117.236	2.62924	7.53007	9.89146	12.4873	0.664145	0.317026	0.530977	0.656574	0.349165	0.947614	0.794183	0.808253	0.739967
19	19.2279	21.0729	22.3806	21.891	18.9328	35.2258	41.03	19.6034	206.691	189.632	170.974	182.101	45.5001	43.0012	76.1415	45.5496	7.86567	7.20687	12.6143	6.7731	19.2279	21.0729	21.891	22.3806	18.9328	35.2258	19.6034	41.03	189.632	206.691	170.974	182.101	43.0012	45.5001	45.5496	76.1415	7.20687	7.86567	6.7731	12.6143	0.912449	0.537469	0.917467	0.94508	0.916243	0.978124	0.477782	0.938898	0.598222
20	19.7112	21.8062	21.5904	22.477	18.3829	23.2254	26.749	28.3069	275.772	204.149	239.113	194.16	215.448	43.331	208.742	161.397	7.52261	7.66137	9.00542	8.28175	19.7112	21.8062	21.5904	22.477	18.3829	23.2254	26.749	28.3069	204.149	275.772	194.16	239.113	43.331	215.448	161.397	208.742	7.52261	7.66137	8.28175	9.00542	0.90393	0.791503	0.740283	0.201121	0.981889	0.960556	0.944966	0.812002	0.773188
21	35.5096	28.7593	28.3601	28.7307	51.9452	68.394	49.6664	47.9392	185.625	176.343	141.189	159.671	111.476	83.6289	80.8626	91.9938	5.18503	5.31321	8.84977	6.91639	28.7593	35.5096	28.3601	28.7307	51.9452	68.394	47.9392	49.6664	176.343	185.625	141.189	159.671	83.6289	111.476	80.8626	91.9938	5.18503	5.31321	6.91639	8.84977	0.809901	0.759499	0.949996	0.750198	0.975875	0.987101	0.965225	0.884251	0.879
22	22.6336	20.9635	25.0961	21.658	27.9733	21.3581	39.0889	35.8978	187.158	215.877	162.226	175.063	48.3045	34.4804	102.187	123.049	6.52163	5.06353	12.5149	9.3043	20.9635	22.6336	21.658	25.0961	21.3581	27.9733	35.8978	39.0889	187.158	215.877	162.226	175.063	34.4804	48.3045	102.187	123.049	5.06353	6.52163	9.3043	12.5149	0.926213	0.763517	0.866968	0.713812	0.776421	0.863004	0.918363	0.926672	0.830459
23	24.002	27.2567	25.7131	27.5876	23.8188	55.3818	38.8444	40.521	185.875	150.638	152.284	140.431	29.2745	61.6491	90.3158	81.9615	4.34302	6.71234	8.99161	9.25742	24.002	27.2567	25.7131	27.5876	23.8188	55.3818	38.8444	40.521	150.638	185.875	140.431	152.284	29.2745	61.6491	81.9615	90.3158	4.34302	6.71234	8.99161	9.25742	0.880592	0.430084	0.810424	0.474856	0.64702	0.932052	0.958623	0.922162	0.907499
24	20.5182	21.3656	23.9405	21.857	19.4708	20.7393	39.7453	20.9934	170.692	173.08	145.242	167.869	33.3588	36.2999	101.627	29.3335	5.41736	5.23376	10.3056	6.07554	20.5182	21.3656	21.857	23.9405	19.4708	20.7393	20.9934	39.7453	170.692	173.08	145.242	167.869	33.3588	36.2999	29.3335	101.627	5.23376	5.41736	6.07554	10.3056	0.960336	0.938835	0.986204	0.918975	0.966109	0.912975	0.528199	0.865213	0.288639
25	24.4158	25.4784	24.3862	24.7907	28.1956	40.1357	51.2637	56.74	155.723	142.427	130.703	121.292	36.1945	33.0179	52.8948	43.7662	4.61244	6.51282	9.62204	10.5021	24.4158	25.4784	24.3862	24.7907	28.1956	40.1357	51.2637	56.74	142.427	155.723	121.292	130.703	33.0179	36.1945	43.7662	52.8948	4.61244	6.51282	9.62204	10.5021	0.958293	0.702508	0.914615	0.912235	0.708209	0.983684	0.903484	0.927998	0.827419
26	21.6098	22.0662	26.7572	27.5783	22.6247	19.6707	39.4997	53.8392	303.103	274.68	182.92	152.071	107.974	83.3903	72.0163	82.0658	3.53921	4.09181	6.12455	9.132	21.6098	22.0662	26.7572	27.5783	19.6707	22.6247	39.4997	53.8392	274.68	303.103	152.071	182.92	83.3903	107.974	72.0163	82.0658	3.53921	4.09181	6.12455	9.132	0.979319	0.869436	0.906225	0.772315	0.86495	0.970229	0.733661	0.831357	0.877543
27	23.802	28.5116	25.3342	28.9892	28.989	60.9895	43.6872	42.72	201.122	184.832	166.007	161.714	35.5841	72.2664	79.739	87.4809	3.63544	6.79374	7.08899	10.4058	23.802	28.5116	25.3342	28.9892	28.989	60.9895	42.72	43.6872	184.832	201.122	161.714	166.007	35.5841	72.2664	79.739	87.4809	3.63544	6.79374	7.08899	10.4058	0.834818	0.475311	0.919004	0.492402	0.535116	0.873919	0.977863	0.974136	0.911503
28	25.7765	25.8216	23.6869	24.5301	32.7011	34.8372	31.8825	43.5115	263.614	133.073	147.112	119.731	213.573	82.3234	100.291	65.5005	7.15496	9.89742	11.2652	10.2495	25.7765	25.8216	23.6869	24.5301	32.7011	34.8372	31.8825	43.5115	133.073	263.614	119.731	147.112	82.3234	213.573	65.5005	100.291	7.15496	9.89742	10.2495	11.2652	0.998252	0.938683	0.504803	0.385457	0.722912	0.965628	0.732738	0.813874	0.653102
29	20.0016	20.3216	23.486	26.6077	18.2933	16.8586	36.8824	41.3146	227.341	376.892	178.697	221.572	21.406	109.853	128.94	160.646	2.73386	1.99121	7.6307	6.81336	20.0016	20.3216	23.486	26.6077	16.8586	18.2933	36.8824	41.3146	227.341	376.892	178.697	221.572	21.406	109.853	128.94	160.646	1.99121	2.73386	6.81336	7.6307	0.984249	0.921572	0.603198	0.194861	0.728352	0.882677	0.892721	0.806494	0.802636
30	20.6244	23.2869	24.2959	32.6931	17.8845	20.2694	42.6235	33.4263	413.387	168.012	153.128	149.474	255.718	142.882	48.7391	85.384	4.67009	4.64682	9.2015	8.39877	20.6244	23.2869	24.2959	32.6931	17.8845	20.2694	33.4263	42.6235	168.012	413.387	149.474	153.128	142.882	255.718	48.7391	85.384	4.64682	4.67009	8.39877	9.2015	0.885665	0.882341	0.406427	0.558751	0.995016	0.743149	0.784223	0.976138	0.570823
31	22.5013	21.1351	24.672	26.9045	20.0857	21.0152	36.8323	36.7561	196.126	383.984	176.493	200.108	170.952	163.486	136.239	150.058	6.72755	6.68334	10.9202	11.9569	21.1351	22.5013	24.672	26.9045	20.0857	21.0152	36.7561	36.8323	196.126	383.984	176.493	200.108	163.486	170.952	136.239	150.058	6.68334	6.72755	10.9202	11.9569	0.939285	0.955771	0.510765	0.956327	0.993427	0.917022	0.997931	0.881986	0.907913
32	21.7252	21.1498	22.6437	22.4592	23.542	22.2374	42.5073	43.5152	191.667	250.87	176.145	185.355	38.9679	58.7217	56.6736	62.1625	3.4668	4.85662	5.90584	7.34395	21.1498	21.7252	22.4592	22.6437	22.2374	23.542	42.5073	43.5152	191.667	250.87	176.145	185.355	38.9679	58.7217	56.6736	62.1625	3.4668	4.85662	5.90584	7.34395	0.973517	0.944581	0.764009	0.663603	0.71383	0.991854	0.976838	0.950311	0.9117
33	20.6302	21.8008	26.0849	22.0674	20.7665	24.3364	35.2137	35.1914	226.381	193.193	113.884	182.18	44.3684	38.577	81.1923	110.575	5.31505	5.70374	8.78641	8.96829	20.6302	21.8008	22.0674	26.0849	20.7665	24.3364	35.1914	35.2137	193.193	226.381	113.884	182.18	38.577	44.3684	81.1923	110.575	5.31505	5.70374	8.78641	8.96829	0.946307	0.853308	0.853399	0.869471	0.931855	0.845982	0.999367	0.625116	0.734275
34	29.4176	24.2125	25.376	25.8167	42.2551	41.2179	42.9953	48.3332	153.916	179.507	145.826	132.718	22.3781	39.1915	83.8709	71.5994	6.76084	8.40199	9.57768	12.2912	24.2125	29.4176	25.376	25.8167	41.2179	42.2551	42.9953	48.3332	153.916	179.507	132.718	145.826	22.3781	39.1915	71.5994	83.8709	6.76084	8.40199	9.57768	12.2912	0.823062	0.975454	0.857436	0.570994	0.804671	0.98293	0.88956	0.910113	0.853685
35	22.2602	21.7812	23.7011	25.1718	24.2965	22.4971	36.8783	32.1974	222.57	264.267	273.195	191.99	56.2107	67.776	211.252	144.434	5.02969	5.54139	6.6605	6.0819	21.7812	22.2602	23.7011	25.1718	22.4971	24.2965	32.1974	36.8783	222.57	264.267	191.99	273.195	56.2107	67.776	144.434	211.252	5.02969	5.54139	6.0819	6.6605	0.978484	0.925943	0.842216	0.829361	0.907658	0.94157	0.873072	0.702758	0.683706
36	21.4871	21.3086	23.3446	22.8781	27.1517	19.7612	39.3573	35.2147	203.828	208.738	139.364	154.797	34.7382	43.219	81.2925	62.0508	3.67329	5.6566	7.79538	7.43314	21.3086	21.4871	22.8781	23.3446	19.7612	27.1517	35.2147	39.3573	203.828	208.738	139.364	154.797	34.7382	43.219	62.0508	81.2925	3.67329	5.6566	7.43314	7.79538	0.991693	0.727806	0.976477	0.803771	0.649381	0.980018	0.894746	0.900301	0.763303
37	21.2325	20.9544	22.9814	23.2999	20.8847	21.0702	33.415	41.2818	192.713	157.569	144.43	120.477	161.872	55.7273	96.6804	54.5861	5.08496	5.49692	8.14086	8.78415	20.9544	21.2325	22.9814	23.2999	20.8847	21.0702	33.415	41.2818	157.569	192.713	120.477	144.43	55.7273	161.872	54.5861	96.6804	5.08496	5.49692	8.14086	8.78415	0.986904	0.9912	0.817634	0.344268	0.925056	0.986332	0.809437	0.834155	0.564603
38	22.0226	20.8578	22.4529	23.8932	35.9536	36.1814	34.033	61.2276	167.825	169.216	169.309	152.917	35.035	27.3064	64.9759	40.719	5.11206	4.51979	7.77084	2.2268	20.8578	22.0226	22.4529	23.8932	35.9536	36.1814	34.033	61.2276	167.825	169.216	152.917	169.309	27.3064	35.035	40.719	64.9759	4.51979	5.11206	2.2268	7.77084	0.947107	0.993703	0.991782	0.779402	0.884142	0.939719	0.555844	0.903186	0.626679
39	24.4766	24.1197	26.6236	31.5097	36.8779	42.4276	41.1511	40.615	202.734	233.858	130.864	121.455	70.0709	137.051	76.3358	67.4477	9.53982	10.2561	11.2971	10.7497	24.1197	24.4766	26.6236	31.5097	36.8779	42.4276	40.615	41.1511	202.734	233.858	121.455	130.864	70.0709	137.051	67.4477	76.3358	9.53982	10.2561	10.7497	11.2971	0.985416	0.869196	0.866912	0.511275	0.930162	0.844934	0.986971	0.928105	0.883566
40	23.8155	26.8476	27.058	28.5356	44.4073	48.1289	55.141	43.7499	198.655	177.555	157.39	148.451	45.9091	105.521	78.5075	81.1735	6.75636	8.74355	7.77074	8.58001	23.8155	26.8476	27.058	28.5356	44.4073	48.1289	43.7499	55.141	177.555	198.655	148.451	157.39	45.9091	105.521	78.5075	81.1735	6.75636	8.74355	7.77074	8.58001	0.887063	0.922676	0.893789	0.435071	0.772725	0.94822	0.793418	0.943203	0.967156
41	27.6549	24.217	24.6486	24.7886	39.5428	43.8084	41.481	39.8933	149.417	177.106	177.118	172.7	33.2036	49.7503	116.039	120.842	7.52601	8.36906	12.4982	11.2018	24.217	27.6549	24.6486	24.7886	39.5428	43.8084	39.8933	41.481	149.417	177.106	172.7	177.118	33.2036	49.7503	116.039	120.842	7.52601	8.36906	11.2018	12.4982	0.875687	0.90263	0.843658	0.667406	0.899266	0.994351	0.961724	0.975059	0.960252
42	25.4022	27.4277	25.7065	26.5114	42.4745	55.4574	40.8613	47.9769	161.127	148.918	156.357	130.998	56.3919	65.9596	63.5066	64.6796	6.28415	7.78503	7.7195	8.15614	25.4022	27.4277	25.7065	26.5114	42.4745	55.4574	40.8613	47.9769	148.918	161.127	130.998	156.357	56.3919	65.9596	63.5066	64.6796	6.28415	7.78503	7.7195	8.15614	0.926149	0.765894	0.92423	0.854945	0.807209	0.969638	0.851688	0.837812	0.981865
43	23.4476	24.5255	25.6154	27.0706	47.0281	48.7901	39.9389	39.969	126.335	165.125	125.268	126.461	51.1835	60.6791	47.8113	61.4121	5.5386	5.41195	8.92967	8.86402	23.4476	24.5255	25.6154	27.0706	47.0281	48.7901	39.9389	39.969	126.335	165.125	125.268	126.461	51.1835	60.6791	47.8113	61.4121	5.41195	5.5386	8.86402	8.92967	0.956049	0.963885	0.765086	0.843511	0.977135	0.946243	0.999248	0.990571	0.778532
44	21.4084	20.6465	22.2309	20.7191	19.2234	20.5819	28.7535	28.4111	174.886	261.018	193.69	223.913	24.7045	61.0153	61.4508	182.707	4.40371	4.21205	8.41702	8.36897	20.6465	21.4084	20.7191	22.2309	19.2234	20.5819	28.4111	28.7535	174.886	261.018	193.69	223.913	24.7045	61.0153	61.4508	182.707	4.21205	4.40371	8.36897	8.41702	0.964411	0.933997	0.670015	0.40489	0.956478	0.931992	0.988092	0.865026	0.336335
45	24.3726	29.9516	24.8328	33.937	29.2817	56.974	44.9201	41.5487	233.014	164.561	217.619	142.859	52.0073	84.7469	115.295	59.8338	5.50756	8.95663	9.40644	9.3817	24.3726	29.9516	24.8328	33.937	29.2817	56.974	41.5487	44.9201	164.561	233.014	142.859	217.619	52.0073	84.7469	59.8338	115.295	5.50756	8.95663	9.3817	9.40644	0.813733	0.513948	0.706231	0.613679	0.614914	0.731732	0.924947	0.656465	0.518965
46	21.5111	19.2548	20.3073	25.2083	34.9787	17.8254	19.033	45.0611	241.644	237.489	241.133	168.415	44.1476	39.3636	32.5046	117.882	4.75497	3.13667	3.3906	8.55967	19.2548	21.5111	20.3073	25.2083	17.8254	34.9787	19.033	45.0611	237.489	241.644	168.415	241.133	39.3636	44.1476	32.5046	117.882	3.13667	4.75497	3.3906	8.55967	0.895114	0.509607	0.982803	0.891636	0.659661	0.80558	0.422382	0.698431	0.275739
47	20.9403	20.4856	23.8796	24.8049	16.9883	20.6679	41.7362	45.561	289.021	211.726	158.054	142.737	138.56	39.9067	75.7879	83.8666	4.08407	4.62716	9.64891	8.54412	20.4856	20.9403	23.8796	24.8049	16.9883	20.6679	41.7362	45.561	211.726	289.021	142.737	158.054	39.9067	138.56	75.7879	83.8666	4.08407	4.62716	8.54412	9.64891	0.978289	0.821965	0.732564	0.28801	0.88263	0.962698	0.916051	0.903088	0.903673
48	20.1777	20.8418	29.2646	30.7721	20.3758	22.8528	38.882	49.2423	295.386	953.278	844.499	112.903	22.8111	245.211	412.854	40.4707	1.25416	2.35554	6.45155	4.76635	20.1777	20.8418	29.2646	30.7721	20.3758	22.8528	38.882	49.2423	295.386	953.278	112.903	844.499	22.8111	245.211	40.4707	412.854	1.25416	2.35554	4.76635	6.45155	0.968137	0.891609	0.309864	0.0930264	0.53243	0.951011	0.789606	0.133692	0.0980266
49	24.8262	28.8629	28.067	25.6539	33.4056	27.413	44.4805	48.7915	160.265	194.884	139.182	241.997	38.6407	72.5621	75.5884	181.029	6.28502	1.88243	10.9755	6.20074	24.8262	28.8629	25.6539	28.067	27.413	33.4056	44.4805	48.7915	160.265	194.884	139.182	241.997	38.6407	72.5621	75.5884	181.029	1.88243	6.28502	6.20074	10.9755	0.860144	0.82061	0.82236	0.532519	0.299511	0.914025	0.911644	0.575139	0.417548
50	22.7871	24.6568	28.8565	30.0476	33.4654	28.6854	43.8817	44.4856	200.502	173.187	142.933	161.295	69.9723	52.2402	68.4846	93.637	4.72014	4.39027	11.7645	11.2861	22.7871	24.6568	28.8565	30.0476	28.6854	33.4654	43.8817	44.4856	173.187	200.502	142.933	161.295	52.2402	69.9723	68.4846	93.637	4.39027	4.72014	11.2861	11.7645	0.924173	0.857165	0.863766	0.746584	0.930114	0.96036	0.986425	0.886159	0.731384
51	23.6661	24.7749	29.2179	29.0774	38.4758	44.2145	49.6387	38.822	167.256	164.539	138.677	145.16	61.4365	72.1227	64.6269	53.5449	12.1457	9.62721	13.988	10.9742	23.6661	24.7749	29.0774	29.2179	38.4758	44.2145	38.822	49.6387	164.539	167.256	138.677	145.16	61.4365	72.1227	53.5449	64.6269	9.62721	12.1457	10.9742	13.988	0.955242	0.870209	0.983755	0.851834	0.792643	0.995192	0.782092	0.955338	0.828524
52	21.7437	25.9506	26.4481	25.4765	20.8397	48.3334	47.2551	47.0255	184.341	154.527	130.712	131.008	56.3278	74.0111	43.3993	53.9094	3.72203	6.9472	8.26008	8.27652	21.7437	25.9506	25.4765	26.4481	20.8397	48.3334	47.0255	47.2551	154.527	184.341	130.712	131.008	56.3278	74.0111	43.3993	53.9094	3.72203	6.9472	8.26008	8.27652	0.837886	0.431167	0.838266	0.761073	0.535759	0.963266	0.995142	0.997745	0.805041
53	21.7676	24.086	22.9384	24.4803	23.2054	31.5867	28.8657	41.3366	191.599	185.06	266.524	335.06	50.1405	86.9571	104.448	279.454	7.64739	15.3174	9.38448	8.52917	21.7676	24.086	22.9384	24.4803	23.2054	31.5867	28.8657	41.3366	185.06	191.599	266.524	335.06	50.1405	86.9571	104.448	279.454	7.64739	15.3174	8.52917	9.38448	0.903746	0.734656	0.965875	0.576612	0.49926	0.937012	0.698308	0.795452	0.373757
54	27.3648	27.6916	29.4931	28.4902	61.8808	48.0842	49.5775	44.7452	236.421	161.802	229.326	200.577	112.026	55.4452	135.724	109.902	3.62407	6.66104	10.096	9.15598	27.3648	27.6916	28.4902	29.4931	48.0842	61.8808	44.7452	49.5775	161.802	236.421	200.577	229.326	55.4452	112.026	109.902	135.724	3.62407	6.66104	9.15598	10.096	0.988197	0.777046	0.684381	0.494932	0.544069	0.965997	0.90253	0.874638	0.80975
55	26.6761	20.4808	24.9186	23.8621	43.6824	18.0609	37.2564	33.3857	163.871	240.986	191.288	224.113	42.3109	27.1328	84.2161	48.7372	5.55364	3.79027	9.52934	6.54894	20.4808	26.6761	23.8621	24.9186	18.0609	43.6824	33.3857	37.2564	163.871	240.986	191.288	224.113	27.1328	42.3109	48.7372	84.2161	3.79027	5.55364	6.54894	9.52934	0.767758	0.413459	0.680001	0.641271	0.682485	0.957602	0.896107	0.853533	0.578716
56	23.1492	27.0132	25.6237	25.2825	23.9151	50.6528	35.8417	40.7958	217.088	137.203	150.347	140.829	57.9321	68.0081	110.46	78.1627	4.26495	8.29678	9.41336	7.56655	23.1492	27.0132	25.2825	25.6237	23.9151	50.6528	35.8417	40.7958	137.203	217.088	140.829	150.347	57.9321	68.0081	78.1627	110.46	4.26495	8.29678	7.56655	9.41336	0.856959	0.472138	0.632018	0.851842	0.514049	0.986684	0.878564	0.936691	0.707613
57	22.2511	17.7403	26.61	20.3591	19.2341	23.0731	31.0158	42.2554	226.538	410.696	149.863	267.125	201.094	131.58	83.3015	170.546	3.95351	3.73137	9.24513	10.6916	17.7403	22.2511	20.3591	26.61	19.2341	23.0731	31.0158	42.2554	226.538	410.696	149.863	267.125	131.58	201.094	83.3015	170.546	3.73137	3.95351	9.24513	10.6916	0.797277	0.833613	0.551595	0.654321	0.943813	0.765093	0.734009	0.561022	0.48844
58	19.9334	23.131	24.8	24.0512	21.324	58.2021	38.4948	50.4517	214.858	162.056	152.96	161.782	39.8209	58.4669	103.326	94.3975	5.3715	8.60596	11.5012	11.563	19.9334	23.131	24.0512	24.8	21.324	58.2021	38.4948	50.4517	162.056	214.858	152.96	161.782	39.8209	58.4669	94.3975	103.326	5.3715	8.60596	11.5012	11.563	0.861763	0.366379	0.754248	0.681085	0.624161	0.969805	0.763003	0.945467	0.91359
59	24.9834	29.6755	25.1291	25.0343	30.2292	36.8213	36.3384	47.7103	171.541	130.783	176.853	81.9034	94.1298	73.0104	124.298	32.3236	7.44112	12.6307	7.99432	8.46524	24.9834	29.6755	25.0343	25.1291	30.2292	36.8213	36.3384	47.7103	130.783	171.541	81.9034	176.853	73.0104	94.1298	32.3236	124.298	7.44112	12.6307	7.99432	8.46524	0.841887	0.820971	0.762403	0.775635	0.589132	0.996224	0.761645	0.463115	0.26005
60	23.4888	22.2335	24.0726	24.7538	26.7304	21.9938	41.0024	36.3942	890.559	179.895	121.666	111.963	418.06	30.0371	82.0623	73.6042	7.50399	5.50542	10.666	11.3507	22.2335	23.4888	24.0726	24.7538	21.9938	26.7304	36.3942	41.0024	179.895	890.559	111.963	121.666	30.0371	418.06	73.6042	82.0623	5.50542	7.50399	10.666	11.3507	0.946559	0.8228	0.202002	0.0718488	0.733666	0.972481	0.88761	0.920251	0.89693
61	21.6262	28.0267	28.8361	28.6269	30.6112	58.0642	42.7362	41.6714	274.165	194.682	188.994	181.34	118.926	102.486	117.705	118.413	2.05331	5.1293	10.581	9.48936	21.6262	28.0267	28.6269	28.8361	30.6112	58.0642	41.6714	42.7362	194.682	274.165	181.34	188.994	102.486	118.926	117.705	118.413	2.05331	5.1293	9.48936	10.581	0.771628	0.527196	0.710091	0.861765	0.400309	0.992746	0.975083	0.959501	0.994015
62	22.9991	22.4742	26.7143	26.7537	30.3366	33.1865	35.0813	40.306	204.95	197.817	180.259	162.205	63.259	42.3112	121.082	103.483	6.85093	4.94978	8.79016	9.60029	22.4742	22.9991	26.7143	26.7537	30.3366	33.1865	35.0813	40.306	197.817	204.95	162.205	180.259	42.3112	63.259	103.483	121.082	4.94978	6.85093	8.79016	9.60029	0.977176	0.914123	0.965196	0.668857	0.722496	0.998528	0.870375	0.899844	0.854649
63	18.9083	20.8071	22.7996	22.5312	17.9304	18.0427	40.4735	41.0643	230.747	262.601	173.879	160.471	77.8686	61.2253	79.5783	111.366	3.16806	4.20967	11.2472	11.6637	18.9083	20.8071	22.5312	22.7996	17.9304	18.0427	40.4735	41.0643	230.747	262.601	160.471	173.879	61.2253	77.8686	79.5783	111.366	3.16806	4.20967	11.2472	11.6637	0.908742	0.993779	0.878698	0.786264	0.752569	0.988231	0.985613	0.922889	0.714563
64	26.4836	30.034	24.5125	26.3143	35.5773	37.7256	31.6081	36.2329	141.382	128.203	148.188	164.322	84.9522	47.2772	102.97	95.581	8.24137	8.26026	8.72535	7.8779	26.4836	30.034	24.5125	26.3143	35.5773	37.7256	31.6081	36.2329	128.203	141.382	148.188	164.322	47.2772	84.9522	95.581	102.97	8.24137	8.26026	7.8779	8.72535	0.881788	0.943055	0.906786	0.556515	0.997713	0.931529	0.87236	0.901815	0.92824
65	22.951	22.3698	22.0243	23.7858	28.6322	30.2965	34.1791	38.411	177.138	180.148	182.625	174.672	48.6361	56.4345	141.964	115.583	7.57043	11.0124	12.3762	12.4206	22.3698	22.951	22.0243	23.7858	28.6322	30.2965	34.1791	38.411	177.138	180.148	174.672	182.625	48.6361	56.4345	115.583	141.964	7.57043	11.0124	12.3762	12.4206	0.974677	0.945068	0.983295	0.861814	0.687446	0.925943	0.889827	0.956451	0.81417
66	27.3032	26.6148	29.3347	28.9429	83.3018	83.3852	50.8896	50.6601	160.45	153.759	144.754	140.365	57.8479	51.3051	68.5823	65.8371	7.51896	6.1226	11.6379	10.2161	26.6148	27.3032	28.9429	29.3347	83.3018	83.3852	50.6601	50.8896	153.759	160.45	140.365	144.754	51.3051	57.8479	65.8371	68.5823	6.1226	7.51896	10.2161	11.6379	0.974787	0.999	0.958298	0.886896	0.814289	0.986645	0.99549	0.96968	0.959972
67	25.4624	26.2455	26.0663	23.7973	27.5531	64.1041	35.5825	39.2499	236.108	172.244	159.843	146.664	71.7461	65.2221	85.6338	89.4387	5.0181	7.5529	7.63245	8.07347	25.4624	26.2455	23.7973	26.0663	27.5531	64.1041	35.5825	39.2499	172.244	236.108	146.664	159.843	65.2221	71.7461	85.6338	89.4387	5.0181	7.5529	7.63245	8.07347	0.970164	0.429819	0.729513	0.909069	0.664394	0.912953	0.906563	0.917549	0.957458
68	25.0294	27.7794	26.582	28.3415	42.2052	53.8117	38.7108	49.4481	205.12	144.162	330.713	113.261	59.7487	51.2177	278.089	59.9942	8.23135	8.89612	9.1281	9.56148	25.0294	27.7794	26.582	28.3415	42.2052	53.8117	38.7108	49.4481	144.162	205.12	113.261	330.713	51.2177	59.7487	59.9942	278.089	8.23135	8.89612	9.1281	9.56148	0.901005	0.784313	0.702815	0.857217	0.925275	0.93792	0.782858	0.342476	0.215737
69	20.9512	21.7921	22.1282	20.9714	18.9208	22.0559	20.7114	21.0913	225.092	229.076	186.302	188.029	203.52	36.2743	36.9588	35.6894	5.76941	6.31188	4.49272	2.90662	20.9512	21.7921	20.9714	22.1282	18.9208	22.0559	20.7114	21.0913	225.092	229.076	186.302	188.029	36.2743	203.52	35.6894	36.9588	5.76941	6.31188	2.90662	4.49272	0.961413	0.857854	0.982609	0.178235	0.914056	0.947724	0.981986	0.990813	0.965653
70	22.6382	24.5473	26.1568	27.3369	37.6677	51.2155	35.8548	34.7894	171.101	172.695	148.159	171.067	37.5092	107.93	110.457	126.253	7.72062	7.5334	11.2921	12.7149	22.6382	24.5473	26.1568	27.3369	37.6677	51.2155	34.7894	35.8548	171.101	172.695	148.159	171.067	37.5092	107.93	110.457	126.253	7.5334	7.72062	11.2921	12.7149	0.922228	0.735473	0.990773	0.347532	0.975751	0.956831	0.970284	0.866088	0.874888
71	25.7514	25.126	28.151	23.4931	29.0914	30.7807	48.309	45.1205	256.17	256.884	169.241	204.972	61.353	47.905	118.536	73.7895	4.45054	5.00297	9.80839	10.1588	25.126	25.7514	23.4931	28.151	29.0914	30.7807	45.1205	48.309	256.17	256.884	169.241	204.972	47.905	61.353	73.7895	118.536	4.45054	5.00297	9.80839	10.1588	0.975712	0.945119	0.997222	0.78081	0.88958	0.834539	0.933999	0.825678	0.622509
72	27.3665	26.4549	26.3186	28.9756	48.5878	61.5499	34.5424	43.1904	151.085	202.094	145.296	116.735	78.1643	120.546	61.2951	65.2077	5.81153	6.55573	10.0124	9.41853	26.4549	27.3665	26.3186	28.9756	48.5878	61.5499	34.5424	43.1904	151.085	202.094	116.735	145.296	78.1643	120.546	61.2951	65.2077	5.81153	6.55573	9.41853	10.0124	0.96669	0.789405	0.747598	0.648421	0.886481	0.908301	0.799769	0.80343	0.939998
73	25.876	21.7591	24.9659	25.4596	64.623	29.4735	44.4343	47.7979	146.717	165.584	120.627	123.721	56.7719	27.9285	62.6456	66.5758	9.78389	6.33085	8.84148	10.9941	21.7591	25.876	24.9659	25.4596	29.4735	64.623	44.4343	47.7979	146.717	165.584	120.627	123.721	27.9285	56.7719	62.6456	66.5758	6.33085	9.78389	8.84148	10.9941	0.840897	0.456084	0.886056	0.491943	0.647068	0.980608	0.92963	0.974993	0.940966
74	20.5085	21.0993	24.557	23.4793	22.9063	18.7209	35.2657	34.3189	187.259	211.302	152.908	170.246	38.7416	33.7009	95.3203	128.527	5.25756	5.16728	11.2169	9.96867	20.5085	21.0993	23.4793	24.557	18.7209	22.9063	34.3189	35.2657	187.259	211.302	152.908	170.246	33.7009	38.7416	95.3203	128.527	5.16728	5.25756	9.96867	11.2169	0.971996	0.817284	0.886212	0.869888	0.982829	0.956117	0.973152	0.898155	0.741636
[truncated: 75 more columns]
